# Supplementary material
Source: MDPI journal article supplement (https://www.mdpi.com/2077-0472/13/12/2273)
Supplement: s1 [file s1 › agriculture-2687494-supplementary.pdf]

|                |                                                              |     |
|----------------|--------------------------------------------------------------|-----|
| XM_012175446.4 | TCAAGAGGTAATGTTCTCACCATCCAAGTTAAAGGACCAACCCAGAATTCAAGAAGCG   | 60  |
| H              | TCAAGAGGTAATGTTCTCACCATCCAAGTTAAAGGACCAACCCAGAATTCAAGAAGCG   | 60  |
| E              | TCAAGAGGTAATGTTCTCACCATCCAAGTTAAAGGACCAACCCAGAATTCAAGAAGCG   | 60  |
|                | *****                                                        |     |
| XM_012175446.4 | GACCACAGTGTGGTTAAAAATGAAGAGAGCCTGGTCTTTGTCCAGACAGACAAACCCAT  | 120 |
| H              | GACCACAGTGTGGTTAAAAATGAAGAGAGCCTGGTCTTTGTCCAGACAGACAAACCCAT  | 120 |
| E              | GACCACAGTGTGGTTAAAAATGAAGAGAGCCTAGTCTTTGTCCAGACAGACAAACCCAT  | 120 |
|                | *****                                                        |     |
| XM_012175446.4 | CTATAAACAGAGCAGACAGTGAATTTTCGTATTGTCTTGTGAATGAAAGCTTTACCCC   | 180 |
| H              | CTATAAACAGAGCAGACAGTGAATTTTCGTATTGTCTTGTGAATGAAAGCTTTACCCC   | 180 |
| E              | CTATAAACAGAGCAGACAGTGAATTTTCGTATTGTCTTGTGAATGAAAGCTTTACCCC   | 180 |
|                | *****                                                        |     |
| XM_012175446.4 | CCTGAATGAGTTGGTTCCACTAGTATATATTGAGGACCCCAAAGGAAATCGCATCGCACA | 240 |
| H              | CCTGAATGAGTTGGTTCCACTAGTATATATTGAGGACCCCAAAGGAAATCGCATCGCACA | 240 |
| E              | CCTGAATGAGTTGGTTCCACTAGTATATATTGAGGACCCCAAAGGAAATCGCATCGCACA | 240 |
|                | *****                                                        |     |
| XM_012175446.4 | GTGGCAGAACCTCGAGGTAGAGAATGGCCTCCAGCAGTTGACCTTCCCCCTCTCGTCAGA | 300 |
| H              | GTGGCAGAACCTCGAGGTAGAGAATGGCCTCCAGCAGTTGACCTTCCCCCTCTCGTCAGA | 300 |
| E              | GTGGCAGAACCTCGAGGTAGAGAATGGCCTCCAGCAGTTGACCTTCCCCCTCTCGTCAGA | 300 |
|                | *****                                                        |     |
| XM_012175446.4 | ACCCTTTCAAGGGTCCTATAAGGTGGTGGTACAGAAAGAATCAGGTGGGACTGCAGAGCA | 360 |
| H              | ACCCTTTCAAGGGTCCTATAAGGTGGTGGTACAGAAAGAATCAGGTGGGACTGCAGAGCA | 360 |
| E              | ACCCTTTCAAGGGTCCTATAAGGTGGTGGTACAGAAAGAATCAGGTGGGACTGCAGAGCA | 360 |
|                | *****                                                        |     |
| XM_012175446.4 | CCACTTCACCGTGGAGGAATTTGTGCTTCCTAAGTTTGAAGTACAAGTAAGAATGCCAAA | 420 |
| H              | CCACTTCACCGTGGAGGAATTTGTGCTTCCTAAGTTTGAAGTACAAGTAAGAATGCCAAA | 420 |
| E              | CCACTTCACCGTGGAGGAATTTGTGCTTCCTAAGTTTGAAGTACAAGTAAGAATGCCAAA | 420 |
|                | *****                                                        |     |
| XM_012175446.4 | GACAATCACCATCTTGAAGAAGAGGTG                                  | 448 |
| H              | GACAATCACCATCTTGAAGAAGAGGTG                                  | 448 |
| E              | GACAATCACCATCTTGAAGAAGAGGTG                                  | 448 |
|                | *****                                                        |     |

Figure S1. A2M marker (448-bp) sequences and GenBank gb|XM\_012175446.4| for analyzing nitrogenous bases alignment for DNA in healthy and endometritis ewes.

```

DQ890157.1  CACCTGAGGAATCTTGAATATTTGGACTTATCCTATAATCGCTTATCTAACTTATCATCT 60
H           CACCTGAGGAATCTTGAATATTTGGACTTATCCTATAATCGCTTATCTAACTTATCATCT 60
E           CACCTGAGGAATCTTGAATATTTGGACTTATCCTATAATCGCTTATCTAACTTATCATCT 60
            *****

DQ890157.1  TCCTGGTTCAGGTCCCTTTATGTCTTGAAATTCTTAACTTACTGGGAAATTTATACAAA 120
H           TCCTGGTTCAGGTCCCTTTATGTCTTGAAATTCTTAACTTACTGGGAAATTTATACAAA 120
E           TCCTGGTTCAGGTCCCTTTATGTCTTGAAATTCTTAACTTACTGGGAAATTTATACAAA 120
            *****

DQ890157.1  ACACCTTGGGGAAACATCTCTTTTTTCTCATCTCCCAAATCTGCGGACCCCTGAAAGTAGGA 180
H           ACACCTTGGGGAAACATCTCTTTTTTCTCATCTCCCAAATCTGCGGACCCCTGAAAGTAGGA 180
E           ACACCTTGGGGAAACATCTCTTTTTTCTCATCTCCCAAATCTGCGGACCCCTGAAAGTAGGA 180
            *****

DQ890157.1  AATAGTAACAGCTTCAGTCAGATTGAAAAGGATTTCAGTGGACTGACTTTTCTTGAG 240
H           AATAGTAACAGCTTCAGTCAGATTGAAAAGGATTTCAGTGGACTGACTTTTCTTGAG 240
E           AATAGTAACAGCTTCAGTCAGATTGAAAAGGATTTCAGTGGACTGACTTTTCTTGAG 240
            *****

DQ890157.1  GAGCTTGAGATCAGTGCTCAAAATCTGCAGTTGTATGTGCCAAAGAGTTTAAAGTCGATC 300
H           GAGCTTGAGATCAGTGCTCAAAATCTGCAGTTGTATGTGCCAAAGAGTTTAAAGTCGATC 300
E           GAGCTTGAGATCAGTGCTCAAAATCTGCAGTTGTATGTGCCAAAGAGTTTAAAGTCGATC 300
            *****

DQ890157.1  CAGAACATTAGCCATCTGATTCTGCATCTGAGGCAGCCTG  340
H           CAGAACATTAGCCATCTGATTCTGCATCTGAGGCAGCCTG  340
E           CAGAACATTAGCCATCTGATTCTGCATCTGAGGCAGCCTG  340
            *****

```

Figure S2. *TLR2* marker (340-bp) sequences and GenBank gb|DQ890157.1| for analyzing nitrogenous bases alignment for DNA in healthy and endometritis ewes.

|                |                                                              |     |
|----------------|--------------------------------------------------------------|-----|
| NM_001009400.2 | CTGACGCCTGGCCGGCCGGTCCGCCGACTGTCCACCTGCAAGACCATCGACATGGAGCTG | 60  |
| H              | CTGACGCCTGGCCGGCCGGTCCGCCGACTGTCCACCTGCAAGACCATCGACATGGAGCTG | 60  |
| E              | CTGACGCCTGGCCGGCCGGTCCGCCGACTGTCCACCTGCAAGACCATCGACATGGAGCTG | 60  |
|                | *****                                                        |     |
| NM_001009400.2 | GTGAAGCGGAAGGGCATCGAGGCCATCCGCGGTGAGATTTTGTCCAACTTCGGCTCGCC  | 120 |
| H              | GTGAAGCGGAAGGGCATCGAGGCCATCCGCGGTGAGATTTTGTCCAACTTCGGCTCGCC  | 120 |
| E              | GTGAAGCGGAAGGGCATCGAGGCCATCCGCGGTGAGATTTTGTCCAACTTCGGCTCGCC  | 120 |
|                | *****                                                        |     |
| NM_001009400.2 | AGTCCCCGAGCCAGGGGGACGTGCCACCCGGCCCGCTGCCCGAGGCCATACTGGCCCTT  | 180 |
| H              | AGTCCCCGAGCCAGGGGGACGTGCCACCCGGCCCGCTGCCCGAGGCCATACTGGCCCTT  | 180 |
| E              | AGTCCCCGAGCCAGGGGGACGTGCCACCCGGCCCGCTGCCCGAGGCCATACTGGCCCTT  | 180 |
|                | *****                                                        |     |
| NM_001009400.2 | TACAACAGTACCCGCGACCGGGTGGCCGGGGAAAGTGCCGAAACGGAGCCTGAGCCAGAG | 240 |
| H              | TACAACAGTACCCGCGACCGGGTGGCCGGGGAAAGTGCCGAAACGGAGCCTGAGCCAGAG | 240 |
| E              | TACAACAGTACCCGCGACCGGGTGGCCGGGGAAAGTGCCGAAACGGAGCCTGAGCCAGAG | 240 |
|                | *****                                                        |     |
| NM_001009400.2 | GCGGACTACTACGCCAAGGAGGTCACCCGCGTGCTAATGGTGAATACGGCAACAAAATC  | 300 |
| H              | GCGGACTACTACGCCAAGGAGGTCACCCGCGTGCTAATGGTGAATACGGCAACAAAATC  | 300 |
| E              | GCGGACTACTACGCCAAGGAGGTCACCCGCGTGCTAATGGTGAATACGGCAACAAAATC  | 300 |
|                | *****                                                        |     |
| NM_001009400.2 | TATGACAAATGAAGTCTAGCTCGCACAGCATATATATGTTCTTCAACACGTCCGAGCTC  | 360 |
| H              | TATGACAAATGAAGTCTAGCTCGCACAGCATATATATGTTCTTCAACACGTCCGAGCTC  | 360 |
| E              | TATGACAAATGAAGTCTAGCTCGCACAGCATATATATGTTCTTCAACACGTCTGAGCTC  | 360 |
|                | *****                                                        |     |
| NM_001009400.2 | CGGGAAGCAGTGCCTGAACCTGTGTTGCTCTCTC                           | 394 |
| H              | CGGGAAGCAGTGCCTGAACCTGTGTTGCTCTCTC                           | 394 |
| E              | CGGGAAGCAGTGCCTGAACCTGTGTTGCTCTCTC                           | 394 |
|                | *****                                                        |     |

Figure S3. *TGF- $\beta$*  marker (394-bp) sequences and GenBank gb|NM\_001009400.2| for analyzing nitrogenous bases alignment for DNA in healthy and endometritis ewes.

|                |                                                               |     |
|----------------|---------------------------------------------------------------|-----|
| XM_027967477.2 | CCGCGGTTGTGTAAACGGCTCCGCATCCCTCCCAGGCGCGGTCCCTAGGCCCCCGCAGCGC | 60  |
| H              | CCGCGGTTGTGTAAACGGCTCCGCATCCCTCCCAGGCGCGGTCCCTAGGCCCCCGCAGCGC | 60  |
| E              | CCGCGGTTGTGTAAACGGCTCCGCATCCCTCCCAGGCGCGGTCCCTAGTCCCCCGCAGCGC | 60  |
|                | *****                                                         |     |
| XM_027967477.2 | AGCCATGGCCTGGACGGCGGGGGCGGGCGGGCGGGTGGGACCCGCAGGGCGCTCTCGTC   | 120 |
| H              | AGCCATGGCCTGGACGGCGGGGGCGGGCGGGCGGGTGGGACCCGCAGGGCGCTCTCGTC   | 120 |
| E              | AGCCATGGCCTGGACGGCGGGGGCGGGCGGGCGGGTGGGACCCGCAGGGCGCTCTCGTC   | 120 |
|                | *****                                                         |     |
| XM_027967477.2 | GCACACTCTGCTCTTCGAOCTGCCGCCAGCGCTGCTGGGCGAGTTCTGGCGGTCCTGGA   | 180 |
| H              | GCACACTCTGCTCTTCGAOCTGCCGCCAGCGCTGCTGGGCGAGTTCTGGCGGTCCTGGA   | 180 |
| E              | GCACACTCTGCTCTTCGAOCTGCCGCCAGCGCTGCTGGGCGAGTTCTGGCGGTCCTGGA   | 180 |
|                | *****                                                         |     |
| XM_027967477.2 | CAGCTGCGACGGCGCGCTCGGCTGGCGCGGCCCTCGCGGAGCGGCTTTCAGCAGCTGGCT  | 240 |
| H              | CAGCTGCGACGGCGCGCTCGGCTGGCGCGGCCCTCGCGGAGCGGCTTTCAGCAGCTGGCT  | 240 |
| E              | CAGCTGCGACGGCGCGCTCGGCTGGCGCGGCCCTCGCGGAGCGGCTTTCAGCAGCTGGCT  | 240 |
|                | *****                                                         |     |
| XM_027967477.2 | GGATGTTTCGTACATTGAAAAATATGTAGACCAAGGTAAAAGTGAACAAGAGAATTGCT   | 300 |
| H              | GGATGTTTCGTACATTGAAAAATATGTAGACCAAGGTAAAAGTGAACAAGAGAATTGCT   | 300 |
| E              | GGATGTTTCGTACATTGAAAAATATGTAGACCAAGGTAAAAGTGAACAAGAGAATTGCT   | 300 |
|                | *****                                                         |     |
| XM_027967477.2 | TTGGTCCTGGGCTCAGAAAAACAAGACCATCGGTGACCTTTTACAGATCCTCCAGGAGAT  | 360 |
| H              | TTGGTCCTGGGCTCAGAAAAACAAGACCATCGGTGACCTTTTACAGATCCTCCAGGAGAT  | 360 |
| E              | TTGGTCCTGGGCTCAGAAAAACAAGACCATCGGTGACCTTTTACAGATCCTCCAGGAGAT  | 360 |
|                | *****                                                         |     |
| XM_027967477.2 | GGGACATCATCGGGCTATCCATTTAATTGCAAACTATGGAGCAACCTTGAGTCCTATAGA  | 420 |
| H              | GGGACATCATCGGGCTATCCATTTAATTGCAAACTATGGAGCAACCTTGAGTCCTATAGA  | 420 |
| E              | GGGACATCATCGGGCTATCCATTTAATTGCAAACTATGGAGCAACCTTGAGTCCTATAGA  | 420 |
|                | *****                                                         |     |
| XM_027967477.2 | GCAGAGTCATC                                                   | 431 |
| H              | GCAGAGTCATC                                                   | 431 |
| E              | GCAGAGTCATC                                                   | 431 |
|                | *****                                                         |     |

Figure S4. *IRAK3* marker (431-bp) sequences and GenBank gb|XM\_027967477.2| for analyzing nitrogenous bases alignment for DNA in healthy and endometritis ewes.

|                |                                                                |     |
|----------------|----------------------------------------------------------------|-----|
| XM_042254827.1 | CAGTGGGAAGCCCAGAGTTTTTAACCACTGAACTGCCAGGGAAGTCCCCAAGAGACTGGTTT | 60  |
| H              | CAGTGGGAAGCCCAGAGTTTTTAACCACTGAACTGCCAGGGAAGTCCCCAAGAGACTGGTTT | 60  |
| E              | CAGTGGGAAGCCCAGAGTTTTTAACCACTGAACTGCCAGGGAAGTCCCCAAGAGACTGGTTT | 60  |
|                | *****                                                          |     |
| XM_042254827.1 | CTTGATCCATTTCCCTGCATATTTTTTGAATAACCCCAATGTTTATCTCCAAAGATGGAA   | 120 |
| H              | CTTGATCCATTTCCCTGCATATTTTTTGAATAACCCCAATGTTTATCTCCAAAGATGGAA   | 120 |
| E              | CTTGATCCATTTCCCTGCATATTTTTTGAATAACCCCAATGTTTATCTCCAAAGATGGAA   | 120 |
|                | *****                                                          |     |
| XM_042254827.1 | GAGGAAGATTAAACAATAATTTGCAGAAAAGCCCTGCCTTTCCAGAGATCTAGAGTGTA    | 180 |
| H              | GAGGAAGATTAAACAATAATTTGCAGAAAAGCCCTGCCTTTCCAGAGATCTAGAGTGTA    | 180 |
| E              | GAGGAAGATTAAACAATAATTTGCAGAAAAGCCCTGCCTTTCCAGAGATCTAGAGTGTA    | 180 |
|                | *****                                                          |     |
| XM_042254827.1 | ATGCAACCGTATGTGGTTGAGAAGTTTGAATCTTGGCTGCTTTTCGCCCTCTGCACAAGC   | 240 |
| H              | ATGCAACCGTATGTGGTTGAGAAGTTTGAATCTTGGCTGCTTTTCGCCCTCTGCACAAGC   | 240 |
| E              | ATGCAACCGTATGTGGTTGAGAAGTTTGAATCTTGGCTGCTTTTCGCCCTCTGCACAAGC   | 240 |
|                | *****                                                          |     |
| XM_042254827.1 | AGAAACCCCGTTTTTCGGGGACCGTGATCTCATCGTGTGCTCTCACTTTTGAAGAAAAA    | 300 |
| H              | AGAAACCCCGTTTTTCGGGGACCGTGATCTCATCGTGTGCTCTCACTTTTGAAGAAAAA    | 300 |
| E              | AGAAACCCCGTTTTTCGGGGACCGTGATCTCATCGTGTGCTCTCACTTTTGAAGAAAAA    | 300 |
|                | *****                                                          |     |
| XM_042254827.1 | TAATTAATCATGGGCAAAGGAGATCCTAAGAAGCCGAGAGGCAAAATGTCATCATATGCA   | 360 |
| H              | TAATTAATCATGGGCAAAGGAGATCCTAAGAAGCCGAGAGGCAAAATGTCATCATATGCA   | 360 |
| E              | TAATTAATCATGGGCAAAGGAGATCCTAAGAAGCCGAGAGGCAAAATGTCATCATATGCA   | 360 |
|                | *****                                                          |     |
| XM_042254827.1 | TTCTTTGTGCAAACTTGCCGGGAGGAGCACAGAAGAAGCACCCGGATGCTTCAGTCAAC    | 420 |
| H              | TTCTTTGTGCAAACTTGCCGGGAGGAGCACAGAAGAAGCACCCGGATGCTTCAGTCAAC    | 420 |
| E              | TTCTTTGTGCAAACTTGCCGGGAGGAGCACAGAAGAAGCACCCGGATGCTTCAGTCAAC    | 420 |
|                | *****                                                          |     |
| XM_042254827.1 | TTCTCAGAGT                                                     | 430 |
| H              | TTCTCAGAGT                                                     | 430 |
| E              | TTCTCAGAGT                                                     | 430 |
|                | *****                                                          |     |

Figure S5. *HMGB1* marker (430-bp) sequences and GenBank gb|XM\_042254827.1| for analyzing nitrogenous bases alignment for DNA in healthy and endometritis ewes.

|                |                                                               |     |
|----------------|---------------------------------------------------------------|-----|
| XM_042257020.1 | AGCGCGAAGCGACCTGATGGGAGTGTAGAGTGGGGAGCGGCAGCCCTATGCCTCAGCCCT  | 60  |
| H              | AGCGCGAAGCGACCTGATGGGAGTGTAGAGTGGGGAGCGGCAGCCCTATGCCTCAGCCCT  | 60  |
| E              | AGCGCGAAGCGACCTGATGGGAGTGTAGAGTGGGGAGCGGCAGCCCTATGCCTCAGCCCT  | 60  |
|                | *****                                                         |     |
| XM_042257020.1 | CCAGTTTCCAGCGCTAACTCCAGCTGCCCTTCCAGCGCATCGGACAGCCAACTCAGCCTCA | 120 |
| H              | CCAGTTTCCAGCGCTAACTCCAGCTGCCCTTCCAGCGCATCGGACAGCCAACTCAGCCTCA | 120 |
| E              | CCAGTTTCCAGCGCTAACTCCAGCTGCCCTTCCAGCGCATCGGACAGCCAACTCAGCCTCA | 120 |
|                | *****                                                         |     |
| XM_042257020.1 | AGGTTTAAAGAAAAGAACTAGAAGGTTTCCAATCACCAGCACATCAAAAACAGAAAAGG   | 180 |
| H              | AGGTTTAAAGAAAAGAACTAGAAGGTTTCCAATCACCAGCACATCAAAAACAGAAAAGG   | 180 |
| E              | AGGTTTAAAGAAAAGAACTAGAAGGTTTCCAATCACCAGCACATCAAAAACAGAAAAGG   | 180 |
|                | *****                                                         |     |
| XM_042257020.1 | AAAAGTCCAAGTGGATTTTATTTCTGGATTGAGATGGATCTAGAATCCCAGCTAAGCCT   | 240 |
| H              | AAAAGTCCAAGTGGATTTTATTTCTGGATTGAGATGGATCTAGAATCCCAGCTAAGCCT   | 240 |
| E              | AAAAGTCCAAGTGGATTTTATTTCTGGATTGAGATGGATCTAGAATCCCAGCTAAGCCT   | 240 |
|                | *****                                                         |     |
| XM_042257020.1 | GGAGATCCAAAGGTCACCAGCCAGAGGGCAGGATGGAGAATGCTCATCTTCCTCCTGATG  | 300 |
| H              | GGAGATCCAAAGGTCACCAGCCAGAGGGCAGGATGGAGAATGCTCATCTTCCTCCTGATG  | 300 |
| E              | GGAGATCCAAAGGTCACCAGCCAGAGGGCAGGATGGAGAATGCTCATCTTCCTCCTGATG  | 300 |
|                | *****                                                         |     |
| XM_042257020.1 | TGCCTGCTGCCGGCCGCCAGTGCAGTACGGGGCCACGGCTGGTGTCCGGGGAGTCTGGG   | 360 |
| H              | TGCCTGCTGCCGGCCGCCAGTGCAGTACGGGGCCACGGCTGGTGTCCGGGGAGTCTGGG   | 360 |
| E              | TGCCTGCTGCCGGCCGCCAGTGCAGTACGGGGCCACGGCTGGTGTCCGGGGAGTCTGGG   | 360 |
|                | *****                                                         |     |
| XM_042257020.1 | GGAGCTGTGACCATCCGGTGCCGGTA 386                                |     |
| H              | GGAGCTGTGACCATCCGGTGCCGGTA 386                                |     |
| E              | GGAGCTGTGACCATCCGGTGCCGGTA 386                                |     |
|                | *****                                                         |     |

Figure S6. *FCAMR* marker (386-bp) sequences and GenBank gb|XM\_042257020.1| for analyzing nitrogenous bases alignment for DNA in healthy and endometritis ewes.

|                |                                                              |     |
|----------------|--------------------------------------------------------------|-----|
| XM_004006435.5 | AGGTCGGCTTGCTTCCTCGCGCTGGGCTGGACTGGTATAGAGGGCTTCTGAGGGCGGTGC | 60  |
| H              | AGGTCGGCTTGCTTCCTCGCGCTGGGCTGGACTGGTATAGAGGGCTTCTGAGGGCGGTGC | 60  |
| E              | AGGTCGGCTTGCTTCCTCGCGCTGGGCTGGACTGGTATAGAGGGCTTCTGAGGGCGGTGC | 60  |
|                | *****                                                        |     |
| XM_004006435.5 | GGGCGCAAGAAGCGAAGCGAGGCTGCGGAGAGCGAGCCGGGGGCTGCGGGGCTGCAGTGA | 120 |
| H              | GGGCGCAAGAAGCGAAGCGAGGCTGCGGAGAGCGAGCCGGGGGCTGCGGGGCTGCAGTGA | 120 |
| E              | GGGCGCAAGAAGCGAAGCGAGGCTGCGGAGAGCGAGCCGGGGGCTGCGGGGCTGCAGTGA | 120 |
|                | *****                                                        |     |
| XM_004006435.5 | GATGAAGCAGTGGCTCAGGGAGCGAAGACTGGCAGTGTGGCGCGACGGGCCGCCCGGGG  | 180 |
| H              | GATGAAGCAGTGGCTCAGGGAGCGAAGACTGGCAGTGTGGCGCGACGGGCCGCCCGGGG  | 180 |
| E              | GATGAAGCAGTGGCTCAGGGAGCGAAGACTGGCAGTGTGGCGCGACGGGCCGCCCGGGG  | 180 |
|                | *****                                                        |     |
| XM_004006435.5 | CCGAGGCTGCTGCTCCGGAGGCTGCTGAGACGCCCGCGCGGCCGGCGTGGAGAGCGACAG | 240 |
| H              | CCGAGGCTGCTGCTCCGGAGGCTGCTGAGACGCCCGCGCGGCCGGCGTGGAGAGCGACAG | 240 |
| E              | CCGAGGCTGCTGCTCCGGAGGCTGCTGAGACGCCCGCGCGGCCGGCGTGGAGAGCGACAG | 240 |
|                | *****                                                        |     |
| XM_004006435.5 | GCGAGAGGGAGGAGAGGCAGCGGAGCGCTGGGAAGCCGGCGGGGCGCGGGCGGCTCGAG  | 300 |
| H              | GCGAGAGGGAGGAGAGGCAGCGGAGCGCTGGGAAGCCGGCGGGGCGCGGGCGGCTCGAG  | 300 |
| E              | GCGAGAGGGAGGAGAGGCAGCGGAGCGCTGGGAAGCCGGCGGGGCGCGGGCGGCTCGAG  | 300 |
|                | *****                                                        |     |
| XM_004006435.5 | TTGGCCTCCCCGTCGGGATCCCCCGGGTGGAAACCATGCGGGTGGTCAAGTGGCTGACGG | 360 |
| H              | TTGGCCTCCCCGTCGGGATCCCCCGGGTGGAAACCATGCGGGTGGTCAAGTGGCTGACGG | 360 |
| E              | TTGGCCTCCCCGTCGGGATCCCCCGGGTGGAAACCATGCGGGTGGTCAAGTGGCTGACGG | 360 |
|                | *****                                                        |     |
| XM_004006435.5 | GGCTGCTCTACCAGCTCTCGCTCTTCATCACCAGGCTTGGGAAGTTCACCTTCCACCCCA | 420 |
| H              | GGCTGCTCTACCAGCTCTCGCTCTTCATCACCAGGCTTGGGAAGTTCACCTTCCACCCCA | 420 |
| E              | GGCTGCTCTACCAGCTCTCGCTCTTCATCACCAGGCTTGGGAAGTTCACCTTCCACCCCA | 420 |
|                | *****                                                        |     |
| XM_004006435.5 | GGCAGGAAGCCTTAGTGAGGACACTGGCCTCCTACGAAGTGGTGA 465            |     |
| H              | GGCAGGAAGCCTTAGTGAGGACACTGGCCTCCTACGAAGTGGTGA 465            |     |
| E              | GGCAGGAAGCCTTAGTGAGGACACTGGCCTCCTACGAAGTGGTGA 465            |     |
|                | *****                                                        |     |

Figure S7. *ADAMTS20* marker (465-bp) sequences and GenBank gb|XM\_004006435.5| for analyzing nitrogenous bases alignment for DNA in healthy and endometritis ewes.

|                |                                                               |     |
|----------------|---------------------------------------------------------------|-----|
| XM_027976255.2 | CGGCCTCAGCTTCCGGCTGGGCGCAGACCCCCCTCCACCCTCCCAGACACCTTCCCCTGCT | 60  |
| H              | CGGCCTCAGCTTCCGGCTGGGCGCAGACCCCCCTCCACCCTCCCAGGCACCTTCCCCTGCT | 60  |
| E              | CGGCCTCAGCTTCCGGCTGGGCGCAGACCCCCCTCCACCCTCCCAGACACCTTCCCCTGCT | 60  |
|                | *****                                                         |     |
| XM_027976255.2 | GCGGTCCCCCTTCCCGCCGCGCCTTTAACGAAGTCCTCGCCCCCACCTCCCCACTCCG    | 120 |
| H              | GCGGTCCCCCTTCCCGCCGCGCCTTTAACGAAGTCCTCGCCCCCACCTCCCCACTCCG    | 120 |
| E              | GCGGTCCCCCTTCCCGCCGCGCCTTTAACGAAGTCCTCGCCCCCACCTCCCCACTCCG    | 120 |
|                | *****                                                         |     |
| XM_027976255.2 | CAATATTTTCTTTCGCTCGCCCTTCTCGCCTCCTCCATTGTTGTCTCACGTTTCCCACT   | 180 |
| H              | CAATATTTTCTTTCGCTCGCCCTTCTCGCCTCCTCCATTGTTGTCTCACGTTTCCCACT   | 180 |
| E              | CAATATTTTCTTTCGCTCGCCCTTCTCGCCTCCTCCATTGTTGTCTCTCGTTTCCCACT   | 180 |
|                | *****                                                         |     |
| XM_027976255.2 | CTTTGAGGAAGGATGTTGATCTGGAGAGCGAAGTGCCCCCTCTGCCTCCCAGGTACAGG   | 240 |
| H              | CTTTGAGGAAGGATGTTGATCTGGAGAGCGAAGTGCCCCCTCTGCCTCCCAGGTACAGG   | 240 |
| E              | CTTTGAGGAAGGATGTTGATCTGGAGAGCGAAGTGCCCCCTCTGCCTCCCAGGTACAGG   | 240 |
|                | *****                                                         |     |
| XM_027976255.2 | TTTCGGGATTGCTGCTCGGGGACCAAGGATGGCAGAACGACGACAGGGTGCAAGTTGAA   | 300 |
| H              | TTTCGGGATTGCTGCTCGGGGACCAAGGATGGCAGAACGACGACAGGGTGCAAGTTGAA   | 300 |
| E              | TTTCGGGATTGCTGCTCGGGGACCAAGGATGGCAGAACGACGACAGGGTGCAAGTTGAA   | 300 |
|                | *****                                                         |     |
| XM_027976255.2 | TTTTATATGAATGAAAAACACATTTAAAGAGAGACTAAAGTTATTTTTATCAAAAACCAG  | 360 |
| H              | TTTTATATGAATGAAAAACACATTTAAAGAGAGACTAAAGTTATTTTTATCAAAAACCAG  | 360 |
| E              | TTTTATATGAATGAAAAACACATTTAAAGAGAGACTAAAGTTATTTTTATCAAAAACCAG  | 360 |
|                | *****                                                         |     |
| XM_027976255.2 | AGATCAAGTCTAAGAATAAGTCTGTTCAATTTTCTCTAAAATTATTAAGCTGCTTATTA   | 420 |
| H              | AGATCAAGTCTAAGAATAAGTCTGTTCAATTTTCTCTGAAATTATTAAGCTGCTTATTA   | 420 |
| E              | AGATCAAGTCTAAGAATAAGTCTGTTCAATTTTCTCTAAAATTATTAAGCTGCTTATTA   | 420 |
|                | *****                                                         |     |
| XM_027976255.2 | TACATAATCCGAGTGCTACTAG                                        | 442 |
| H              | TACATAATCCGAGTGCTACTAG                                        | 442 |
| E              | TACATAATCCGAGTGCTACTAG                                        | 442 |
|                | *****                                                         |     |

Figure S8. *KCNT2* marker (442-bp) sequences and GenBank gb|XM\_027976255.2| for analyzing nitrogenous bases alignment for DNA in healthy and endometritis ewes.

|                |                                                                 |     |
|----------------|-----------------------------------------------------------------|-----|
| XM_042253698.1 | TCTGATCCTGAGGACTATTTCAGATGAAGCCAAACACAGAGAACCCTTTATGGCACCTCTCCT | 60  |
| H              | TCTGATCCTGAGGACTATTTCAGATGAAGCCAAACACAGAGAACCCTTTATGGCACCTCTCCT | 60  |
| E              | TCTGATCCTGAGGACTATTTCAGATGAAGCCAAACACAGAGAACCCTTTATGGCACCTCTCCT | 60  |
|                | *****                                                           |     |
| XM_042253698.1 | CCCAGCACGCCTCGGCAGATGAAACGCGATGTCTCCAGCACCAGAGGAATAGTGTCTGGG    | 120 |
| H              | CCCAGCACGCCTCGGCAGATGAAACGCGATGTCTCCAGCACCAGAGGAATAGTGTCTGGG    | 120 |
| E              | CCCAGCACGCCTCGGCAGATGAAACGCGATGTCTCCAGCACCAGAGGAACAGTGTCTGGG    | 120 |
|                | *****                                                           |     |
| XM_042253698.1 | AGGCCCGCGGCCGCGCGAATCTGAAAGAAAAATGAATGTATCAAACCAACCTCCACAC      | 180 |
| H              | AGGCCCGCGGCCGCGCGAATCTGAAAGAAAAATGAATGTATCAAACCAACCTCCACAC      | 180 |
| E              | AGGCCCGCGGCCGCGCGAATCTGAAAGAAAAATGAATGTATCAAACCAACCTCCACAC      | 180 |
|                | *****                                                           |     |
| XM_042253698.1 | AAAGACACTGGAAAACTGTGGAGAACGTGGAAGAATACAGCTATAAGCAGGAGAAAAAG     | 240 |
| H              | AAAGACACTGGAAAACTGTGGAGAACGTGGAAGAATACAGCTATAAGCAGGAGAAAAAG     | 240 |
| E              | AAAGACACTGGAAAACTGTGGAGAACATGGAAGAATACAGCTATAAGCAGGAGAAAAAG     | 240 |
|                | *****                                                           |     |
| XM_042253698.1 | ATCCGAGCGGCTCTCAGGTCCACAGAGCGGGATCATAAGAAGAACGTGCAGTGCTCCTTC    | 300 |
| H              | ATCCGAGCGGCTCTCAGGTCCACAGAGCGGGATCATAAGAAGAACGTGCAGTGCTCCTTC    | 300 |
| E              | ATCCGAGCGGCTCTCAGGTCCACAGAGCGGGATCATAAGAAGAACGTGCAGTGCTCCTTC    | 300 |
|                | *****                                                           |     |
| XM_042253698.1 | ATGCTGGACTCAGTGGGGGGCTCTCTGCCAAAAAGTCCATCCCGGATGTGGATCTCAAT     | 360 |
| H              | ATGCTGGACTCAGTGGGGGGCTCTCTGCCAAAAAGTCCATCCCGGATGTGGATCTCAAT     | 360 |
| E              | ATGCTGGACTCAGTGGGGGGCTCTCTGCCAAAAAGTCCATCCCGGATGTGGATCTCAAT     | 360 |
|                | *****                                                           |     |
| XM_042253698.1 | AAGCCTTACCTCAGTCTCGGCTGCAGCAATGCTAAGCT                          | 398 |
| H              | AAGCCTTACCTCAGTCTCGGCTGCAGCAATGCTAAGCT                          | 398 |
| E              | AAGCCTTACCTCAGTCTCGGCTGCAGCAATGCTAAGCT                          | 398 |
|                | *****                                                           |     |

Figure S9. *MAP3K4* marker (398-bp) sequences and GenBank gb|XM\_042253698.1| for analyzing nitrogenous bases alignment for DNA in healthy and endometritis ewes.

|                |                                                               |     |
|----------------|---------------------------------------------------------------|-----|
| XM_042237057.1 | ATCAAGGCATGGGACATTGGGGTGGCTACCATGAAGAAAGGGGAGATCTGTCAATTTACTG | 60  |
| H              | ATCAAGGCATGGGACATTGGGGTGGCTACCATGAAGAAAGGGGAGATCTGTCAATTTACTG | 60  |
| E              | ATCAAGGCATGGGACATTGGGGTGGCTACCATGAAGAAAGGGGAGATCTGTCAATTTACTG | 60  |
|                | *****                                                         |     |
| XM_042237057.1 | TGCAAAACCAGAATATGCATATGGCTCAGCTGGCAGTCTCCCCAAAATTCCTCGAATGCA  | 120 |
| H              | TGCAAAACCAGAATATGCATATGGCTCAGCTGGCAGTCTCCCCAAAATTCCTCGAATGCA  | 120 |
| E              | TGCAAAACCAGAATATGCATATGGCTCAGCTGGCAGTCTCCCCAAAATTCCTCGAATGCA  | 120 |
|                | *****                                                         |     |
| XM_042237057.1 | ACTCTCTTTTTTGAGATTGAGCTCCTTGATTTCAAAGGAGAGGATTATTGAAGATGGA    | 180 |
| H              | ACTCTCTTTTTTGAGATTGAGCTCCTTGATTTCAAAGGAGAGGATTATTGAAGATGGA    | 180 |
| E              | ACTCTCTTTTTTGAGATTGAGCTCCTTGATTTCAAAGGAGAGGATTATTGAAGATGGA    | 180 |
|                | *****                                                         |     |
| XM_042237057.1 | GGTATTATTTCGAAGAATCAAACGGAAAGGAGAAGGGTATTCAAACCCAAATGAGGGAGCG | 240 |
| H              | GGTATTATTTCGAAGAATCAAACGGAAAGGAGAAGGGTATTCAAACCCAAATGAGGGAGCG | 240 |
| E              | GGTATTATTTCGAAGAATCAAACGGAAAGGAGAAGGGTATTCAAACCCAAATGAGGGAGCG | 240 |
|                | *****                                                         |     |
| XM_042237057.1 | ACAGTAGAGATCCACCTGGAAGGCCGCTGTGGTGGAGGATGTTTGATTGCAGAGATGTG   | 300 |
| H              | ACAGTAGAGATCCACCTGGAAGGCCGCTGTGGTGGAGGATGTTTGATTGCAGAGATGTG   | 300 |
| E              | ACAGTAGAGATCCACCTGGAAGGCCGCTGTGGTGGAGGATGTTTGATTGCAGAGATGTG   | 300 |
|                | *****                                                         |     |
| XM_042237057.1 | GGGTTTCATCGTTGGTGAAGGAGAAGACCACGACATTCGAATCGGAATCGACAAAGCCCTG | 360 |
| H              | GGGTTTCATCGTTGGTGAAGGAGAAGACCACGACATTCGAATCGGAATCGACAAAGCCCTG | 360 |
| E              | GGGTTTCATCGTTGGTGAAGGAGAAGACCACGACATTCGAATCGGAATCGACAAAGCCCTG | 360 |
|                | *****                                                         |     |
| XM_042237057.1 | GAGAAAATGCAGCGTGAGGAACAATGTAT                                 | 389 |
| H              | GAGAAAATGCAGCGTGAGGAACAATGTAT                                 | 389 |
| E              | GAGAAAATGCAGCGTGAGGAACAATGTAT                                 | 389 |
|                | *****                                                         |     |

Figure S10. *FKBP5* marker (389-bp) sequences and GenBank gb|XM\_042237057.1| for analyzing nitrogenous bases alignment for DNA in healthy and endometritis ewes.

|                |                                                                |     |
|----------------|----------------------------------------------------------------|-----|
| XM_012097572.3 | TAGCATAACAACCAACCGTGAGAAGAAGCAGCTCAGAAACCAGGACCAAACTGTATTCACTT | 60  |
| H              | TAGCATAACAACCAACCGTGAGAAGAAGCAGCTCAGAAACCAGGACCAAACTGTATTCACTT | 60  |
| E              | TAGCATAACAACCAACCGTGAGAAGAAGCAGCTCAGAAACCAGGACCAAACTGTATTCACTT | 60  |
|                | *****                                                          |     |
| XM_012097572.3 | TCATTAATCAGTTTCTCTGAGAAGGAAATGACATCTGGTCCTGTCTTCCTCTACATCTTG   | 120 |
| H              | TCATTAATCAGTTTCTCTGAGAAGGAAATGACATCTGGTCCTGTCTTCCTCTACATCTTG   | 120 |
| E              | TCATTAATCAGTTTCTCTGAGAAGGAAATGACATCTGGTCCTGTCTTCCTCTACATCTTG   | 120 |
|                | *****                                                          |     |
| XM_012097572.3 | GTTTTTGAAAAATATTTCACTCCAGGCAGAGCGCAGAATGTGCCCTGCGACCTGGGCTAC   | 180 |
| H              | GTTTTTGAAAAATATTTCACTCCAGGCAGAGCGCAGAATGTGCCCTGCGACCTGGGCTAC   | 180 |
| E              | GTTTTTGAAAAATATTTCACTCCAGGCAGAGCGCAGAATGTGCCCTGCGACCTGGGCTAC   | 180 |
|                | *****                                                          |     |
| XM_012097572.3 | TTCCCCTGCGGCAACACCACCAAGTGCTTACCTCAGCAGCTGCAATGCAACGGCGTGGAC   | 240 |
| H              | TTCCCCTGCGGCAACACCACCAAGTGCTTACCTCAGCAGCTGCAATGCAACGGCGTGGAC   | 240 |
| E              | TTCCCCTGCGGCAACACCACCAAGTGCTTACCTCAGCAGCTGCAATGCAACGGCATGGAC   | 240 |
|                | *****                                                          |     |
| XM_012097572.3 | GACTGCGAAAACGGTGTGGACGAGGACAACCTGCGGAGACATCAACGGATGGTCTACACAA  | 300 |
| H              | GACTGCGAAAACGGTGTGGACGAGGACAACCTGCGGAGACATCAACGGATGGTCTACACAA  | 300 |
| E              | GACTGCGAAAACGGTGTGGACGAGGACAACCTGCGGAGACATCAATGGATGGTCTACACAA  | 300 |
|                | *****                                                          |     |
| XM_012097572.3 | TTTGACAGATATTATGGCAATAACTACAAAATGACTTCCTTGTATCCCAGTACTGTGGCA   | 360 |
| H              | TTTGACAGATATTATGGCAATAACTACAAAATGACTTCCTTGTATCCCAGTACTGTGGCA   | 360 |
| E              | TTTGACAGATATTATGGCAATAACTACAAAATGACTTCCTTGTATCCCAGTACTGTGGCA   | 360 |
|                | *****                                                          |     |
| XM_012097572.3 | GAAACATCTGAATGCTTGGTCGGGTCTGCACCCCTGCAATGTATTTGCCAAGGTTTAGAG   | 420 |
| H              | GAAACATCTGAATGCTTGGTCGGGTCTGCACCCCTGCAATGTATTTGCCAAGGTTTAGAG   | 420 |
| E              | GAAACATCTGAATGCTTGGTCGGGTCTGCACCCCTGCAATGTATTTGCCAAGGTTTAGAG   | 420 |
|                | *****                                                          |     |
| XM_012097572.3 | CTCGAGTGTGATGAG                                                | 435 |
| H              | CTCGAGTGTGATGAG                                                | 435 |
| E              | CTCGAGTGTGATGAG                                                | 435 |
|                | *****                                                          |     |

Figure S11. *RXFP1* marker (435-bp) sequences and GenBank gb|XM\_012097572.3| for analyzing nitrogenous bases alignment for DNA in healthy and endometritis ewes.

|                |                                                               |     |
|----------------|---------------------------------------------------------------|-----|
| E              | CTGCCTGAGGAGCTGCACACTCATCCAGGGCAGAGAAGGCTGGAACCGGGACACGAGCTC  | 60  |
| XR_006060140.1 | CTGCCTGAGGAGCTGCACACTCATCCAGGGCAGAGAAGGCTGGAACCGGGACACGAGCTC  | 60  |
| H              | CTGCCTGAGGAGCTGCACACTCATCCAGGGCAGAGAAGGCTGGAACCGGGACACGAGCTC  | 60  |
|                | *****                                                         |     |
| E              | TAAGAGAGGCCAGCGTGAAGTGTTCATCACACCAGGGGATCTTCCTCCTTCTCGGCT     | 120 |
| XR_006060140.1 | TAAGAGAGGCCAGCGTGAAGTGTTCATCACACCAGGGGATCTTCCTCCTTCTCGGCT     | 120 |
| H              | TAAGAGAGGCCAGCGTGAAGTGTTCATCACACCAGGGGATCTTCCTCCTTCTCGGCT     | 120 |
|                | *****                                                         |     |
| E              | TCTGATAGGTCCTGGGACGAAGGCGCTAAGCAGAATGGCTAACGCCAACTCAAACATATTT | 180 |
| XR_006060140.1 | TCTGATAGGTCCTGGGACGAAGGCGCTAAGCAGAATGGCTAACGCCAACTCAAACATATTT | 180 |
| H              | TCTGATAGGTCCTGGGACGAAGGCGCTAAGCAGAATGGCTAACGCCAACTCAAACATATTT | 180 |
|                | *****                                                         |     |
| E              | CTGAAAAGAGTTGCTGGGGACAAAGTGGAGCCGTGGGTAGGCCTCCTCGAGCTGGGTCTC  | 240 |
| XR_006060140.1 | CTGAAAAGAGTTGCTGGGGACAAAGTGGAGCCGTGGGTAGGCCTCCTCGAGCTGGGTCTC  | 240 |
| H              | CTGAAAAGAGTTGCTGGGGACAAAGTGGAGCCGTGGGTAGGCCTCCTCGAGCTGGGTCTC  | 240 |
|                | *****                                                         |     |
| E              | TGAAGCAGGTGAGATGCAAGATAAAGCAATCGCTTTGCAGCCACCTTTGACGCACTGGGG  | 300 |
| XR_006060140.1 | TGAAGCAGGTGAGATGCAAGATAAAGCAATCGCTTTGCAGCCACCTTTGACGCACTGGGG  | 300 |
| H              | TGAAGCAGGTGAGATGCAAGATAAAGCAATCGCTTTGCAGCCACCTTTGACGCACTGGGG  | 300 |
|                | *****                                                         |     |
| E              | ACTGAGTTGCCATTTTTTCAGTGGGCTGTTGCTGTTTTCTCACAGAAAAAAATTTTTCT   | 360 |
| XR_006060140.1 | ACTGAGTTGCCATTTTTTCAGTGGGCTGTTGCTGTTTTCTCACAGAAAAAGAAATTTTTCT | 360 |
| H              | ACTGAGTTGCCATTTTTTCAGTGGGCTGTTGCTGTTTTCTCACAGAAAAAGAAATTTTTCT | 360 |
|                | *****                                                         |     |
| E              | TCAGTTGGATGGACGATTCAACAACG                                    | 385 |
| XR_006060140.1 | TCAGTTGGATGGACGATTCAACAACG                                    | 385 |
| H              | TCAGTTGGATGGACGATTCAACAACG                                    | 385 |
|                | *****                                                         |     |

Figure S12. *SOD* marker (385-bp) sequences and GenBank gb|XR\_006060140.1| for analyzing nitrogenous bases alignment for DNA in healthy and endometritis ewes.

|                |                                                               |     |
|----------------|---------------------------------------------------------------|-----|
| XM_004016396.5 | CTGCAGCGCCGCTCAGACACCATGGCGGACAACCGGGATCCAGCCAGCGACCAGATGAAA  | 60  |
| H              | CTGCAGCGCCGCTCAGACACCATGGCGGACAACCGGGATCCAGCCAGCGACCAGATGAAA  | 60  |
| E              | CTGCAGCGCCGCTCAGACACCATGGCGGACAACCGGGATCCAGCCAGCGACCAGATGAAA  | 60  |
|                | *****                                                         |     |
| XM_004016396.5 | CATTGGAAGGAGCAGAGGGCCGCGCAGAAACCTGATGTCTGACCACTGGCGCCGGTAAT   | 120 |
| H              | CATTGGAAGGAGCAGAGGGCCGCGCAGAAACCTGATGTCTGACCACTGGCGCCGGTAAT   | 120 |
| E              | CATTGGAAGGAGCAGAGGGCCGCGCAGAAACCTGATGTCTGACCACTGGCGCCGGTAAT   | 120 |
|                | ** *****                                                      |     |
| XM_004016396.5 | CCAGTAGGAGACAAACTCAATGTTCTGACGGTAGGGCCCCGAGGGCCCCCTTCTCGTCCAG | 180 |
| H              | CCAGTAGGAGACAAACTCAATGTTCTGACGGTAGGGCCCCGAGGGCCCCCTTCTCGTCCAG | 180 |
| E              | CCAGTAGGAGACAAACTCAATGTTCTGACGGTAGGGCCCCGAGGGCCCCCTTCTCGTCCAG | 180 |
|                | *****                                                         |     |
| XM_004016396.5 | GATGTGGTTTTCACTGATGAAATGGCTCACTTTGACCGGGAGAGAATTCTGAGAGAGTC   | 240 |
| H              | GATGTGGTTTTCACTGATGAAATGGCTCACTTTGACCGGGAGAGAATTCTGAGAGAGTC   | 240 |
| E              | GATGTGGTTTTCACTGATGAAATGGCTCACTTTGACCGGGAGAGAATTCTGAGAGAGTC   | 240 |
|                | *****                                                         |     |
| XM_004016396.5 | GTGCACGCCAAAGGAGCAGGGGCTTTTGGCTACTTTGAGGTCACACATGACATTACCAGA  | 300 |
| H              | GTGCACGCCAAAGGAGCAGGGGCTTTTGGCTACTTTGAGGTCACACATGACATTACCAGA  | 300 |
| E              | GTGCATGCCAAAGGAGCAGGGGCTTTTGGCTACTTTGAGGTCACACATGACATTACCAGA  | 300 |
|                | *****                                                         |     |
| XM_004016396.5 | TACTCCAAGGCGAAGGTGTTTGAGCATATTGGAAGAGGACGCCCATTCAGTTTCGCTTC   | 360 |
| H              | TACTCCAAGGCGAAGGTGTTTGAGCATATTGGAAGAGGACGCCCATTCAGTTTCGCTTC   | 360 |
| E              | TACTCCAAGGCGAAGGTGTTTGAGCATATTGGAAGAGGACGCCCATTCAGTTTCGCTTC   | 360 |
|                | *****                                                         |     |
| XM_004016396.5 | TCCACTGTTGCTGGAGAATCAGGCTCAGCTGACACAG 397                     |     |
| H              | TCCACTGTTGCTGGAGAATCAGGCTCAGCTGACACAG 397                     |     |
| E              | TCCACTGTTGCTGGAGAATCAGGCTCAGCTGACACAG 397                     |     |
|                | *****                                                         |     |

Figure S13. CAT marker (397-bp) sequences and GenBank gb|XM\_004016396.5| for analyzing nitrogenous bases alignment for DNA in healthy and endometritis ewes.

|                |                                                               |     |
|----------------|---------------------------------------------------------------|-----|
| XM_027968234.2 | CTGAGGATCGTCTAGGAGAGGCGGCCAGCGAGGAGAAAAGGACACAGCGGCCGGACGTTT  | 60  |
| H              | CTGAGGATCGTCTAGGAGAGGCGGCCAGCGAGGAGAAAAGGACACAGCGGCCGGACGTTT  | 60  |
| E              | CTGAGGATCGTCTAGGAGAGGCGGCCAGCGAGGAGAAAAGGACACAGCGTCCGGACGTTT  | 60  |
|                | *****                                                         |     |
| XM_027968234.2 | CCTTTTCCTGGAGTTTGAGTTTGTGAGAGCATGAAAATTGCTTATCTACCATGAACTGG   | 120 |
| H              | CCTTTTCCTGGAGTTTGAGTTTGTGAGAGCATGAAAATTGCTTATCTACCATGAACTGG   | 120 |
| E              | CCTTTTCCTGGAGTTTGAGTTTGTGAGAGCATGAAAATTGCTTATCTACCATGAACTGG   | 120 |
|                | *****                                                         |     |
| XM_027968234.2 | AAGAACTTGTGTAATGAAAAAGTTTGGGGAGAAAGAAATTGGGAGACTGCCATGCCGTTCT | 180 |
| H              | AAGAACTTGTGTAATGAAAAAGTTTGGGGAGAAAGAAATTGGGAGACTGCCATGCCGTTCT | 180 |
| E              | AAGAACTTGTGTAATGAAAAAGTTTGGGGAGAAAGAAATTGGGAGACTACCATGCCGTTCT | 180 |
|                | *****                                                         |     |
| XM_027968234.2 | TTGATGTGCAGAAAAGCTGGGTGTTGACTTAGACCACTGGATGACAATCCAGAGTGCTG   | 240 |
| H              | TTGATGTGCAGAAAAGCTGGGTGTTGACTTAGACCACTGGATGACAATCCAGAGTGCTG   | 240 |
| E              | TTGATGTGCAGAAAAGCTGGGTGTTGACTTAGACCACTGGATGACAATCCAGAGTGCTG   | 240 |
|                | *****                                                         |     |
| XM_027968234.2 | AGCAGCCTCACAGGATTCAGCCCGATGCCATGCTTTTGAGAAAGAATGGATAGAGTGTG   | 300 |
| H              | AGCAGCCTCACAGGATTCAGCCCGATGCCATGCTTTTGAGAAAGAATGGATAGAGTGTG   | 300 |
| E              | AGCAGCCTCACAGGATTCAGCCCGATGCCATGCTTTTGAGAAAGAATGGATAGAGTGTG   | 300 |
|                | *****                                                         |     |
| XM_027968234.2 | CACATGGAATCGGTAGTATCCGAGCGGAGAGGAGTGCAAAATAGAATTTGAGGATTTCA   | 360 |
| H              | CACATGGAATCGGTAGTATCCGAGCGGAGAGGAGTGCAAAATAGAATTTGAGGATTTCA   | 360 |
| E              | CACATGGAATCGGTAGTATCCGAGCGGAGAGGAGTGCAAAATAGAATTTGAGGATTTCA   | 360 |
|                | *****                                                         |     |
| XM_027968234.2 | GAGAATGTCTGCTTCGACAGAAAACGATGAAACGTCTGAATGCCATCAAGAGACA 415   |     |
| H              | GAGAATGTCTGCTTCGACAGAAAACGATGAAACGTCTGAATGCCATCAAGAGACA 415   |     |
| E              | GAGAATGTCTGCTTCGACAGAAAACGATGAAACGTCTGAATGCCATCAAGAGACA 415   |     |
|                | *****                                                         |     |

Figure S14. *NDUFS5* marker (415-bp) sequences and GenBank gb|XM\_027968234.2| for analyzing nitrogenous bases alignment for DNA in healthy and endometritis ewes.

```

MK630326.1      CTACGCAGCCGCGAGGATGGAGCGCCAGCAGCCCGACAGCATGCCCCAGGATTTGTCAGAG 60
H               CTACGCAGCCGCGAGGATGGAGCGCCAGCAGCCCGACAGCATGCCCCAGGATTTGTCAGAG 60
E               CTACGCAGCCGCGAGGATGGAGCGCCAGCAGCCCGACAGCATGCCCCAGGATTTGTCAGAG 60
                *****

MK630326.1      GCCCTGAAGGAGGCCACCAAGGAGGTGCACACCCAGGCGGAGAATGCCGAGTTCATGAAG 120
H               GCCCTGAAGGAGGCCACCAAGGAGGTGCACACCCAGGCGGAGAATGCTGAGTTCATGAAG 120
E               GCCCTGAAGGAGGCCACCAAGGAGGTGCACACCCAGGCGGAGAATGCCGAGTTCATGAAG 120
                *****

MK630326.1      AACTTTCAGAAGGGTGAGCTGACCCGAGAAGGTTTTAAGCTGGTGATGGCATCTTTGTAC 180
H               AACTTTCAGAAGGGTGAGCTGACCCGAGAAGGTTTTAAGCTGGTGATGGCATCTTTGTAC 180
E               AACTTTCAGAAGGGTGAGCTGACCCGAGAAGGTTTTAAGCTGGTGATGGCATCTTTGTAC 180
                *****

MK630326.1      CACATCTACGTGGCCCTGGAGGAGGAGATCGAACGCAACAAGGAGAACCCCGTCTATACT 240
H               CACATCTACGTGGCCCTGGAGGAGGAGATCGAACGCAACAAGGAGAACCCCGTCTATACT 240
E               CACATCTACGTGGCCCTGGAGGAGGAGATCGAACGCAACAAGGAGAACCCCGTCTATACT 240
                *****

MK630326.1      CCCCTCTACTTCCCAGAGGAGCTGCACCGCCGGGCGCCCTGGAGCAGGACATGGCCTTC 300
H               CCCCTCTACTTCCCAGAGGAGCTGCACCGCCGGGCGCCCTGGAGCAGGACATGGCCTTC 300
E               CCCCTCTACTTCCCAGAGGAGCTGCACCGCCGGGCGCCCTGGAGCAGGACATGGCCTTC 300
                *****

MK630326.1      TGGTACGGGCCCCGCTGGCAGGAGGCCATCCCCTACACACAGGCCACCAAGCGCTATGTT 360
H               TGGTACGGGCCCCGCTGGCAGGAGGCCATCCCCTACACACAGGCCACCAAGCGCTATGTT 360
E               TGGTACGGGCCCCGCTGGCAGGAGGCCATCCCCTACACACAGGCCACCAAGCGCTATGTT 360
                *****

MK630326.1      CAGCGACTCCAGGAGGT      377
H               CAGCGACTCCAGGAGGT      377
E               CAGCGACTCCAGGAGGT      377
                *****

```

Figure S15. *HMOX1* marker (377-bp) sequences and GenBank gb|MK630326.1| for analyzing nitrogenous bases alignment for DNA in healthy and endometritis ewes.

```

AF223942.1      CAGGAACCTACCAGCTGACGGGAGATGAGCTCATCTTCGCCACCAAGCAGGCCTGGCGCA 60
H              CAGGAACCTACCAGCTGACGGGAGATGAGCTCATCTTCGCCACCAAGCAGGCCTGGCGCA 60
E              CAGGAACCTACCAGCTGACGGGAGATGAGCTCATCTTCGCCACCAAGCAGGCCTGGCGCA 60
                *****

AF223942.1      ACGCCCCCGCTGCATCGGGAGGATCCAGTGGTGAACCTGCAGGTCTTTGACGCCCGGA 120
H              ACGCCCCCGCTGCATTGGGAGGATCCAGTGGTGAACCTGCAGGTCTTTGACGCCCGGA 120
E              ACGCCCCCGCTGCATCGGGAGGATCCAGTGGTGAACCTGCAGGTCTTTGACGCCCGGA 120
                *****

AF223942.1      GCTGTTCCACGGCCCAGGAAATGTTGGAACACATCTGTAGACACGTGCGTTACGCCACCA 180
H              GCTGTTCCACGGCCCAGGAAATGTTGGAACACATCTGTAGACACGTGCGTTACGCCACCA 180
E              GCTGTTCCACGGCCCAGGAAATGTTGGAACACATCTGTAGACACGTGCGTTACGCCACCA 180
                *****

AF223942.1      ACAACGGCAACATCAGGTCGGCCATCACCGTGTTCCCCCAGCGGAGCGATGGGAAGCATG 240
H              ACAACGGCAACATCAGGTCGGCCATCACCGTGTTCCCCCAGCGGAGCGATGGGAAGCATG 240
E              ACAACGGCAACATCAGGTCGGCCATCACCGTGTTCCCCCAGCGGAGCGATGGGAAGCATG 240
                *****

AF223942.1      ACTTCCGGGTCTGGAATGCCAGCTCATCCGCTATGCCGGCTACCAGATGCCAGATGGCA 300
H              ACTTCCGGGTCTGGAATGCCAGCTCATCCGCTATGCCGGCTACCAGATGCCAGATGGCA 300
E              ACTTCCGGGTCTGGAATGCCAGCTCATCCGCTATGCCGGCTACCAGATGCCAGATGGCA 300
                *****

AF223942.1      GCATCAGAGGGGACCCCGCCAGTGTGGAGTTCACACAGCTGTGCATCGACCTGGGCTGGA 360
H              GCATCAGAGGGGACCCCGCCAGTGTGGAGTTCACACAGCTGTGCATCGACCTGGGCTGGA 360
E              GCATCAGAGGGGACCCCGCCAGTGTGGAGTTCACACAGCTGTGCATCGACCTGGGCTGGA 360
                *****

```

Figure S16. *NOS* marker (360-bp) sequences and GenBank gbAF223942.1| for analyzing nitrogenous bases alignment for DNA in healthy and endometritis ewes.
